# Supplementary material for: Calcium-dependent inactivation controls cardiac L-type Ca2+ currents under β-adrenergic stimulation
Source: PubMed Central journal article supplement — J Gen Physiol. 2019 Feb 27;151(6):786–97. doi: 10.1085/jgp.201812236 (PMC6571991; doi:10.1085/jgp.201812236), 2019-02-27
Supplement: JGP_201812236_sm.pdf [file JGP_201812236_sm.pdf]

## Supplemental material

Morales et al., <https://doi.org/10.1085/jgp.201812236>

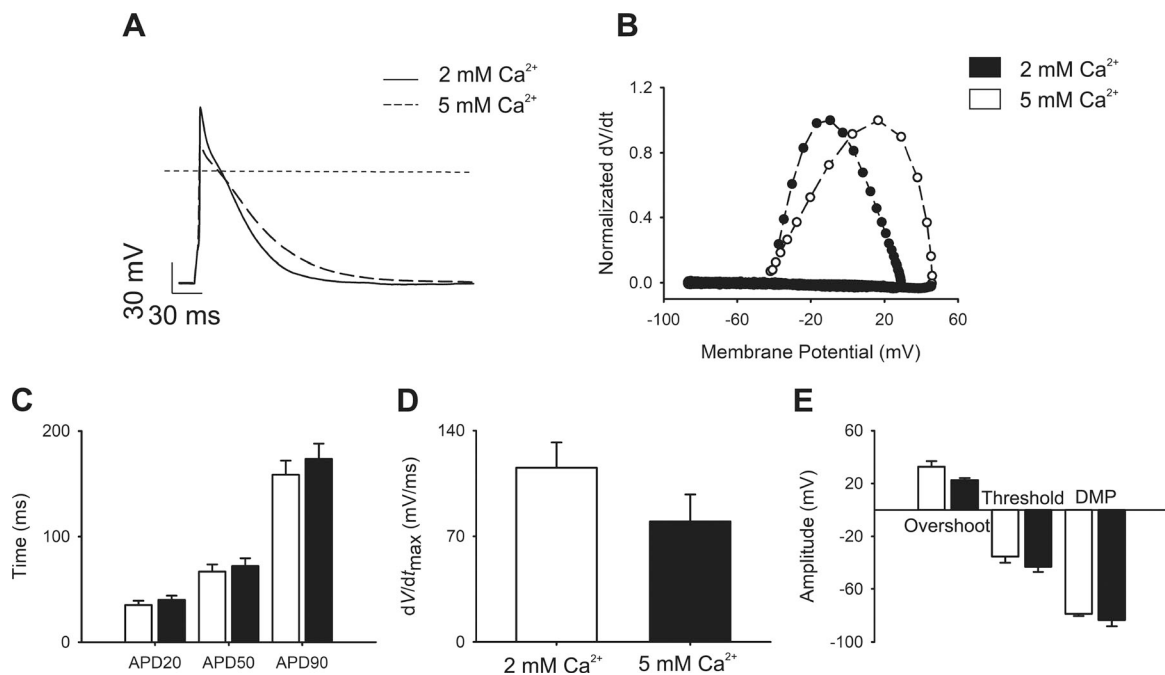

Figure S1. **APs from cardiomyocytes with high external calcium.** (A) Representative AP waveforms from a cardiomyocyte in the presence of 2 mM (solid line) or 5 mM (dashed line) external  $\text{Ca}^{2+}$ . APs were elicited with short (2–5 ms) depolarizing current injections (100–200 pA) at a 1-Hz frequency. The horizontal line represents zero level. (B) Phase plot of the normalized first derivative of membrane potential ( $dV/dt$ ) against membrane potential ( $V_m$ ) for the APs shown in A. Controls are represented by empty symbols, and isoproterenol-treated cardiomyocytes are represented by filled symbols. (C) Bar graph (mean  $\pm$  SEM) of overshoot, threshold potentials, and mean resting membrane potentials. (D) Bar graph (mean  $\pm$  SEM) of maximum rate of potential change ( $dV/dt_{\text{max}}$ ). (E) Bar graph (mean  $\pm$  SEM) of APD estimated at 20% (APD<sub>20</sub>), 50% (APD<sub>50</sub>), and 90% (APD<sub>90</sub>) repolarization. For each bar graph, empty bars represent cardiomyocytes at 2 mM external  $\text{Ca}^{2+}$  and hatched bars, cardiomyocytes at 5 mM  $\text{Ca}^{2+}$  ( $n = 10$ ).

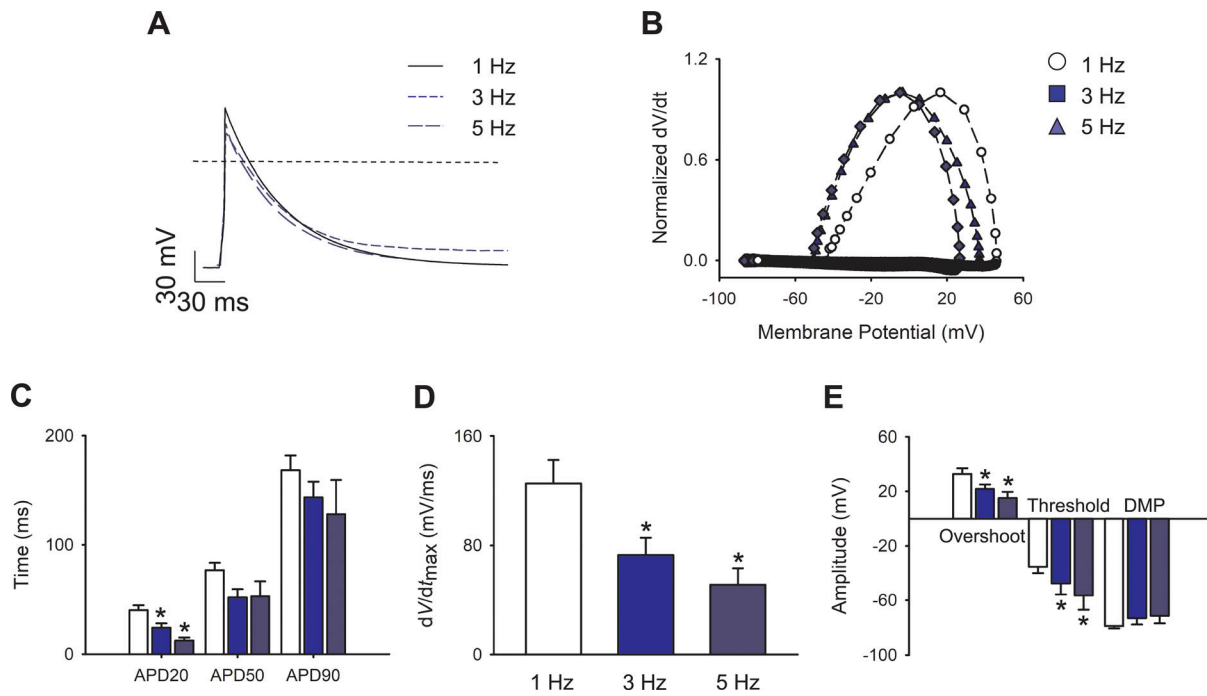

Figure S2. **APs from cardiomyocytes with different stimulation frequency.** (A) Representative AP waveforms from a cardiomyocyte stimulated at a frequency of 1 Hz (solid line), 3 Hz (blue dashed line), or 5 Hz (gray dashed line). APs were elicited with short (2–5 ms) depolarizing current injections (100–200 pA) at a 1-Hz frequency. The horizontal line represents zero level. (B) Phase plot of the normalized first derivative of membrane potential ( $dV/dt$ ) against membrane potential ( $V_m$ ) for the APs shown in A. Cardiomyocytes stimulated at 1 Hz are shown with empty symbols, at 3 Hz with blue symbols, and at 5 Hz with gray symbols. (C) Bar graph (mean  $\pm$  SEM) of APD estimated at 20% ( $APD_{20}$ ), 50% ( $APD_{50}$ ), and 90% ( $APD_{90}$ ) repolarization. (D) Bar graph (mean  $\pm$  SEM) of maximum rate of potential change ( $dV/dt_{max}$ ). (E) Bar graph (mean  $\pm$  SEM) of overshoot, threshold potentials, and mean resting membrane potentials. For each bar graph, empty bars represent cardiomyocytes at 1-Hz frequency stimulation; blue bars represent cardiomyocytes at 3-Hz frequency stimulation; and gray bars represent cardiomyocytes at 5-Hz frequency stimulation ( $n = 10$ ; \*,  $P < 0.01$ , with respect to 2 mM  $Ca^{2+}$ ).

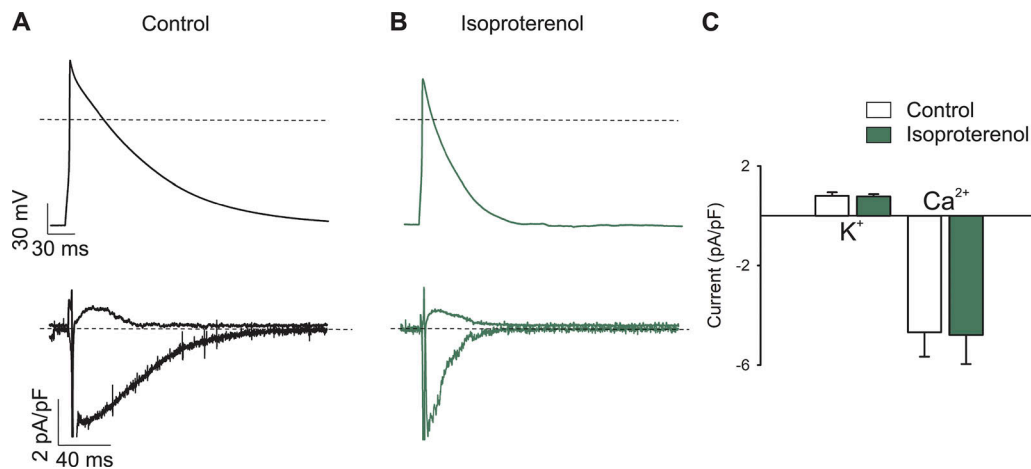

Figure S3. **Calcium-dependent potassium currents and L-type calcium currents during an AP.** (A and B) Upper panels depict representative AP waveforms from a control cardiomyocyte (A) or one treated with 100 nM isoproterenol (B). Bottom panels represent the respective calcium-dependent potassium currents (outward currents) and the L-type calcium currents. The horizontal line represents zero level. (C) Bar graph (mean  $\pm$  SEM) of maximal current normalized by cell capacitance (pA/pF). Empty bars represent control cardiomyocytes and hatched bars represent cardiomyocytes treated with 100 nM isoproterenol ( $n = 4$ ).

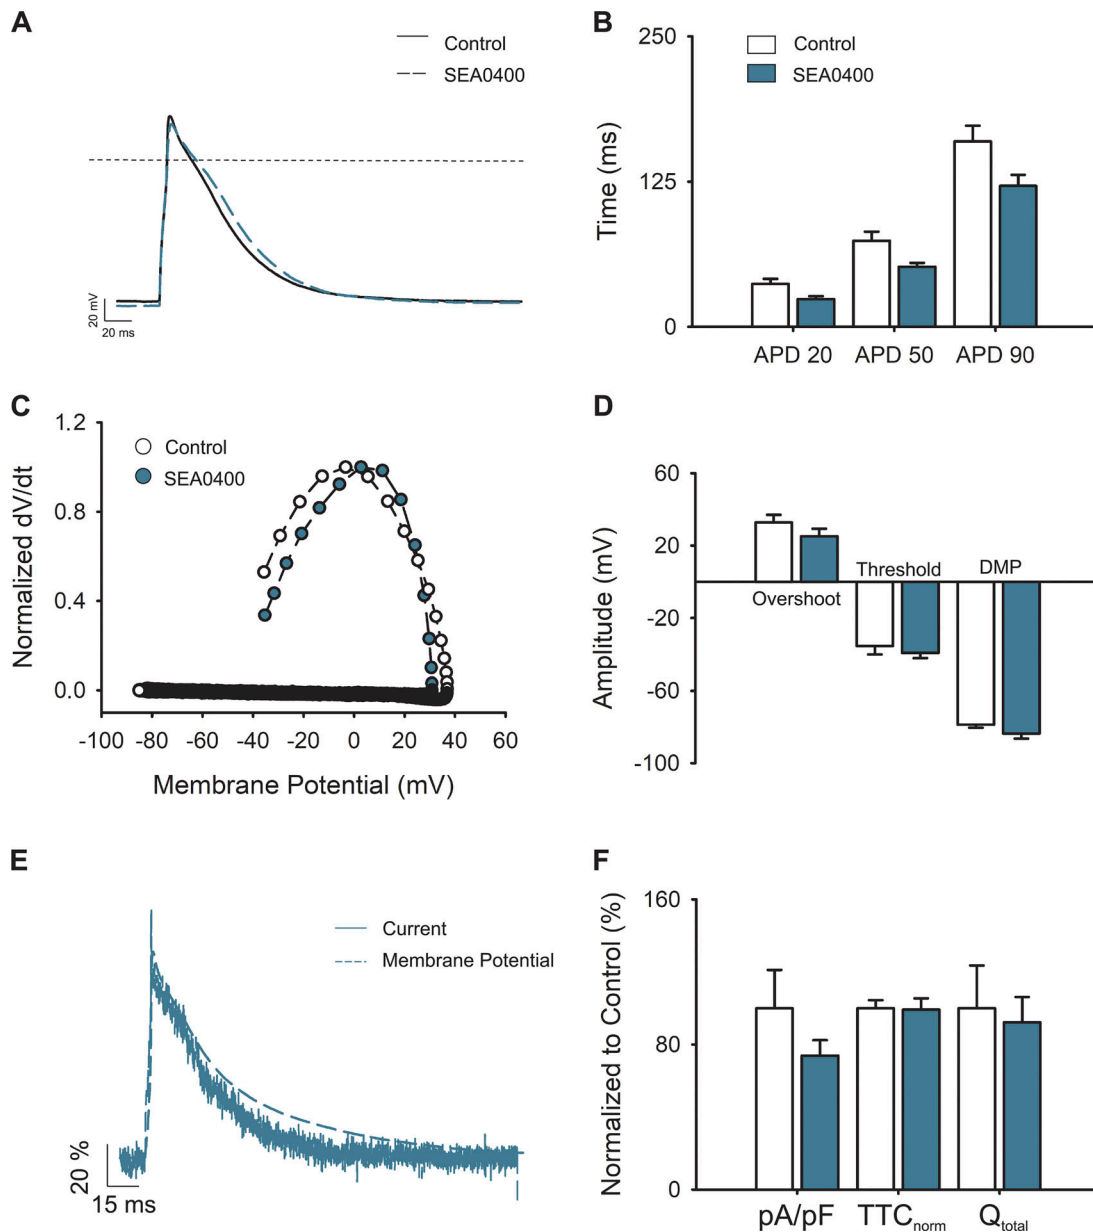

Figure S4. **Role of NCX on APs and L-type calcium currents in newborn rat cardiomyocytes.** (A) Representative AP waveforms from a cardiomyocyte control (solid line) or with an inhibitor of NCX (1  $\mu$ M SEA0400; dashed light blue line). APs were elicited with short (2–5 ms) depolarizing current injections (100–200 pA) at a 1-Hz frequency. (B) Bar graph (mean  $\pm$  SEM) of APD estimated at 20% (APD<sub>20</sub>), 50% (APD<sub>50</sub>), and 90% (APD<sub>90</sub>) repolarization. (C) Phase plot of the normalized first derivative of membrane potential (dV/dt) against membrane potential ( $V_m$ ) for the APs shown in A. Cardiomyocyte controls are shown with empty symbols and cardiomyocytes treated with 1  $\mu$ M SEA0400 with light blue symbols. (D) Bar graph (mean  $\pm$  SEM) of overshoot, threshold potentials, and mean DMPs. (E) Representative nifedipine-sensitive current (solid line) elicited by the AP (dashed line) prerecorded from the same cardiomyocyte treated with 1  $\mu$ M SEA0400. (F) Bar graph (mean  $\pm$  SEM) of maximal current normalized by cell capacitance (pA/pF), total time of nifedipine-sensitive current normalized by its APD (TTC<sub>norm</sub>), and the total current integral normalized by cell capacitance (Q<sub>total</sub>). Data are presented as percentages with respect to cardiomyocyte controls. For each bar graph, empty bars represent cardiomyocyte controls and light blue bars represent cardiomyocytes treated with 1  $\mu$ M SEA0400 ( $n = 5$ ; \*,  $P < 0.01$  with respect to control).

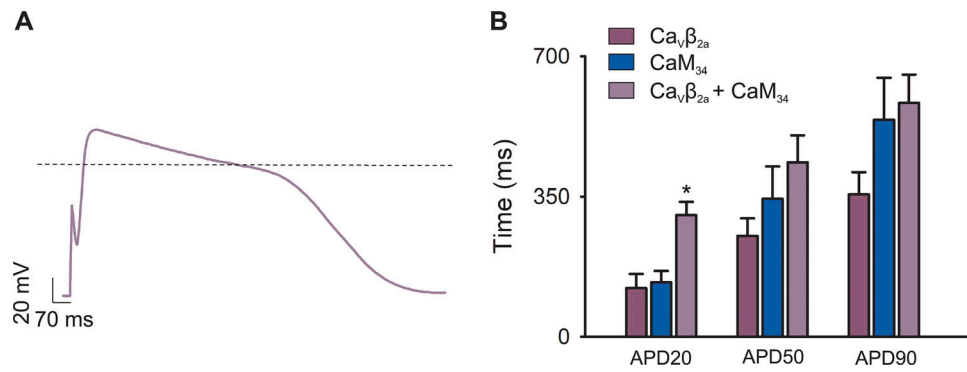

Figure S5. **Complementary role of VDI and CDI on APs.** (A) Representative AP waveform from cardiomyocytes overexpressing Ca<sub>v</sub>β<sub>2a</sub> and CaM<sub>34</sub>. APs were elicited with short (2–5 ms) depolarizing current injections (100–200 pA) at a 1-Hz frequency. (B) Bar graph (mean ± SEM) of APD estimated at 20% (APD<sub>20</sub>), 50% (APD<sub>50</sub>), and 90% (APD<sub>90</sub>) repolarization for cardiomyocytes overexpressing Ca<sub>v</sub>β<sub>2a</sub> (light red bars), CaM<sub>34</sub> (blue bars), or both (light purple bars). *n* = 7; \*, *P* < 0.01, one-way ANOVA.
